# Supplementary material for: Comparative Analysis of Biological Signatures between Freshly Preserved and Cryo-Preserved Bone Marrow Mesenchymal Stem Cells
Source: MDPI journal article supplement (doi:10.3390/cells12192355), 2023-09-26
Supplement: s1 [file s1]

# **Comparative Analysis of Biological Signatures between Freshly Preserved and Cryo-Preserved Bone Marrow Mesenchymal Stem Cells (Supplementary Materials)**

Taesic Lee <sup>1,2,†</sup>, Sangwon Hwang <sup>3,†</sup>, Dongmin Seo <sup>4</sup>, Sungyoon Cho <sup>5</sup>,  
Sunja Yang <sup>5</sup>, Hyunsoo Kim <sup>5</sup>, Jangyoung Kim <sup>6</sup> and Young Uh <sup>7,\*</sup>

1 Division of Data Mining and Computational Biology, Regenerative Medicine Research Center,  
Wonju Severance Christian Hospital, Wonju 26426, Republic of Korea; ddasic123@yonsei.ac.kr

2 Department of Family Medicine, Yonsei University Wonju College of Medicine,  
Wonju 26426, Republic of Korea

3 Department of Precision Medicine, Yonsei University Wonju College of Medicine,  
Wonju 26426, Republic of Korea; arsenal@yonsei.ac.kr

4 Department of Medical Information, Yonsei University Wonju College of Medicine,  
Wonju 26426, Republic of Korea; dmseo@yonsei.ac.kr

5 Pharmicell Co., Ltd., Seongnam 13229, Republic of Korea; sungyoon9030@pharmicell.com (S.C.);  
sun-ja@pharmicell.com (S.Y.); khsmid@pharmicell.com (H.K.)

6 Department of Internal Medicine, Yonsei University Wonju College of Medicine,  
Wonju 26426, Republic of Korea; kimjy@yonsei.ac.kr

7 Department of Laboratory Medicine, Yonsei University Wonju College of Medicine,  
Wonju 26426, Republic of Korea

\* Correspondence: u931018@yonsei.ac.kr; Tel.: +82-33-741-1592

† These authors contributed equally to this work.

## Supplementary Figure S1. Actual photographs for manufacturing MSC.

### Culturing of MSC

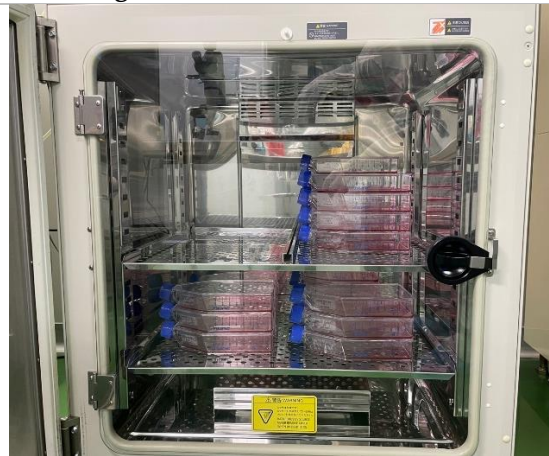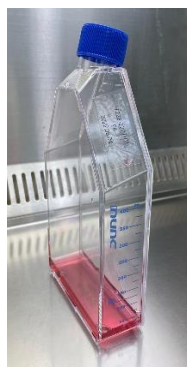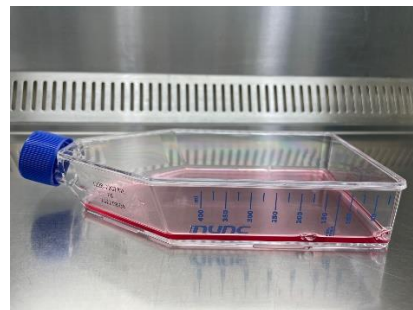

### Before freezing

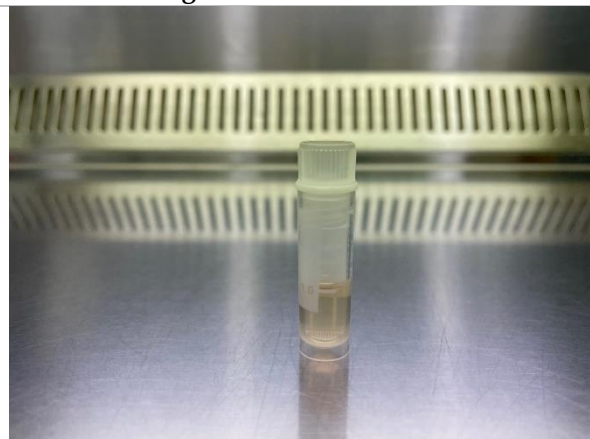

### After freezing

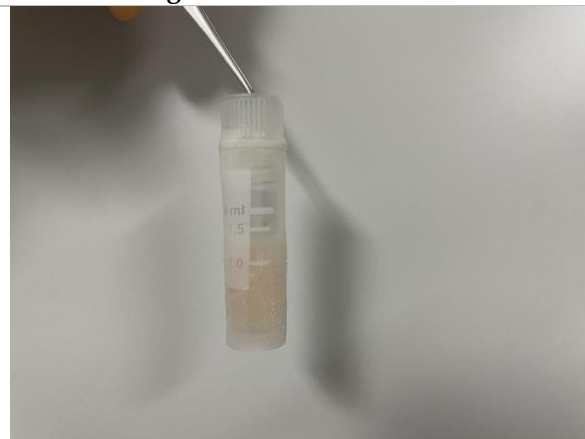

**Supplementary Figure S2.** Distribution of the amount of BM extracted.

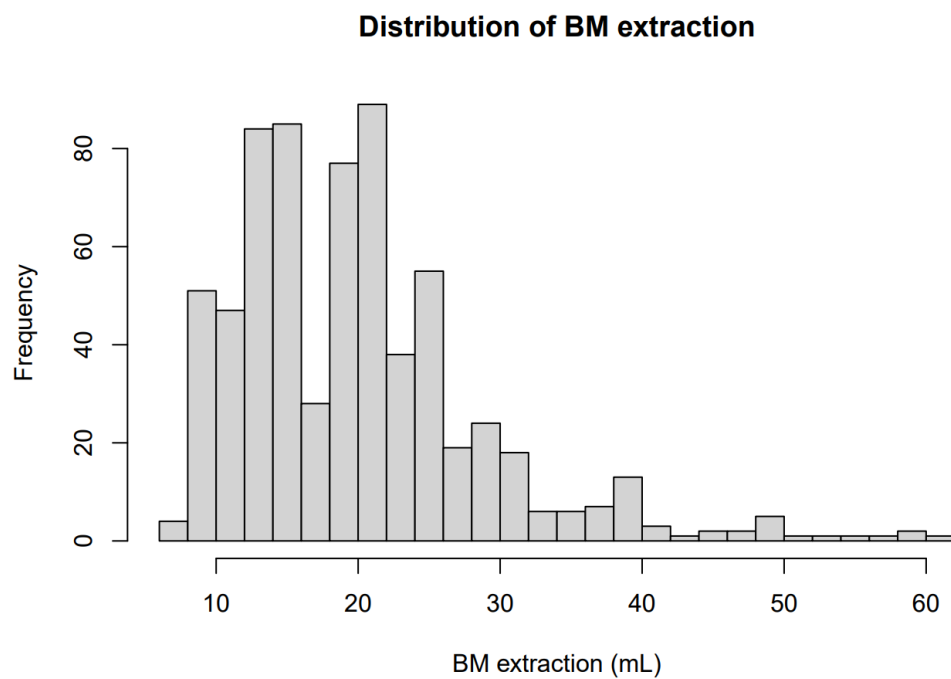

**Supplementary Figure S3** Distribution of the number of MNCs at each passage according to the type of preservation.

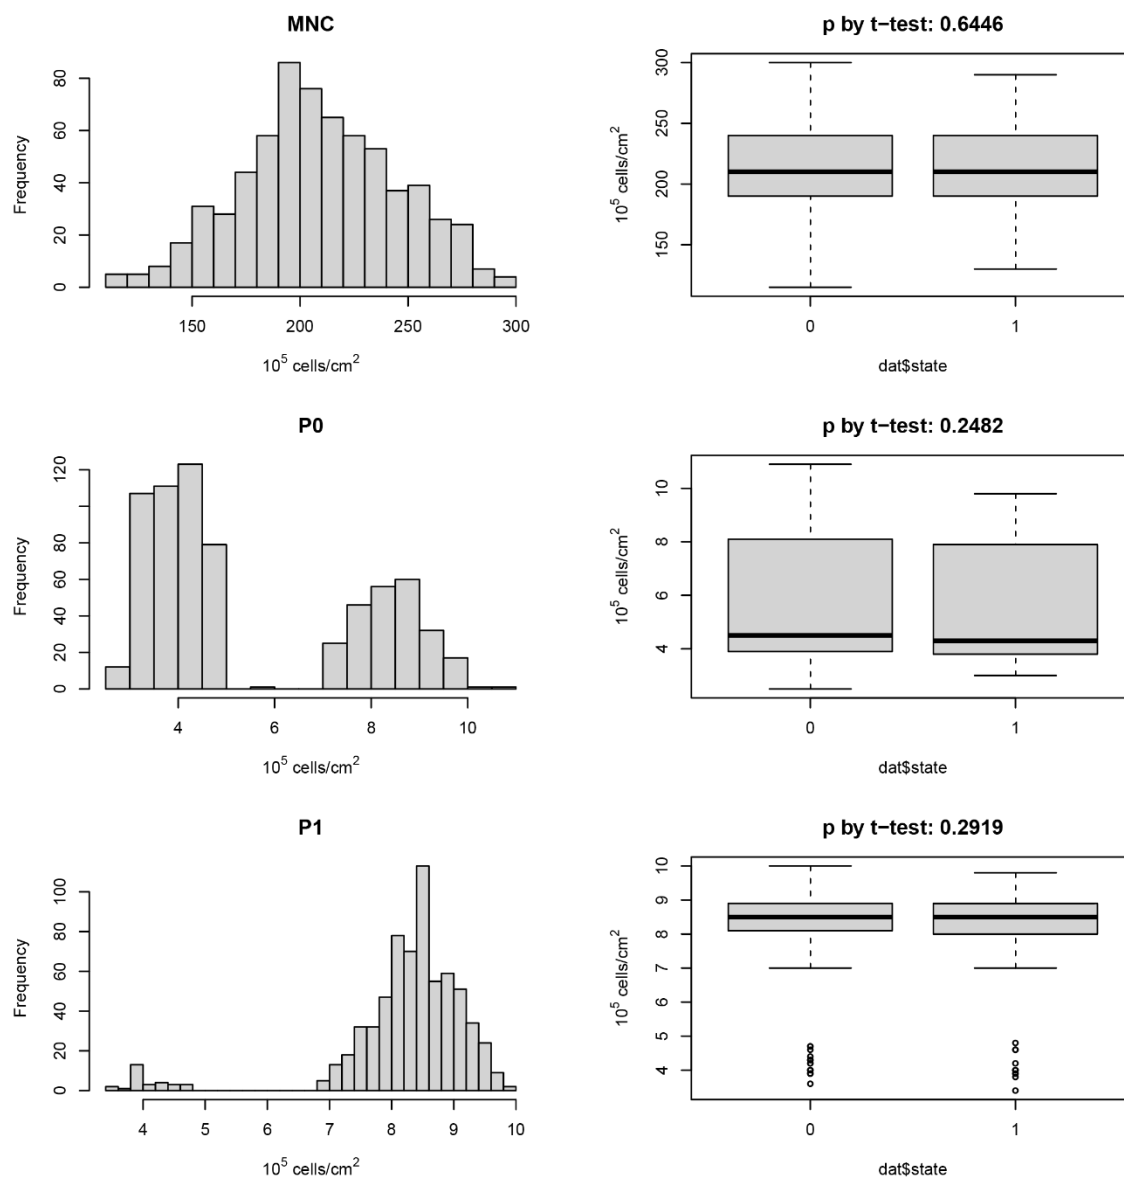

**Supplementary Figure S3.** Distribution of the number of MNCs at each passage according to the type of preservation, continued.

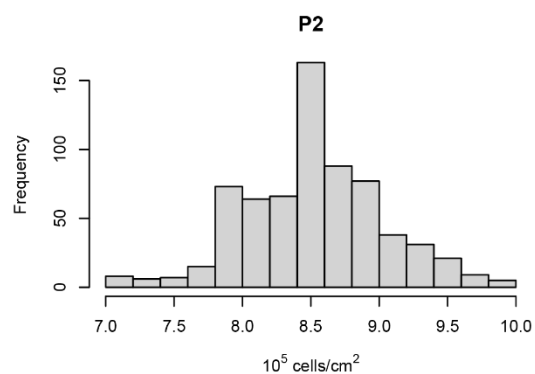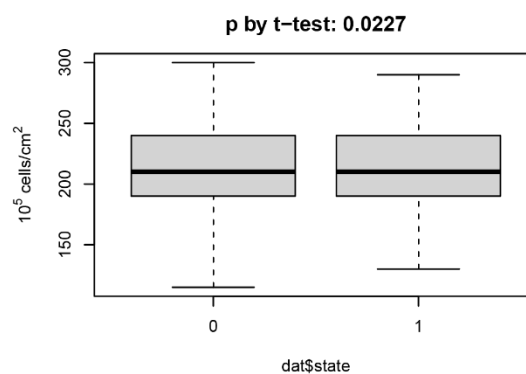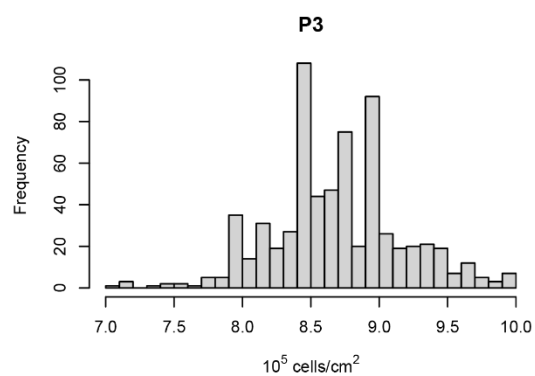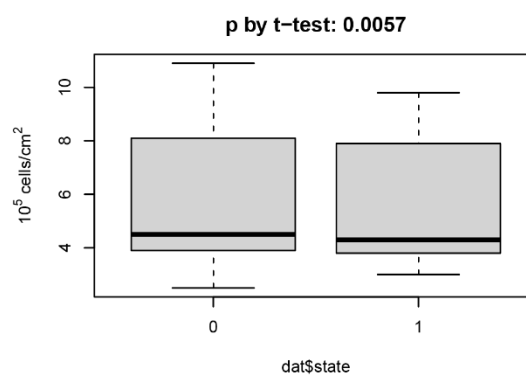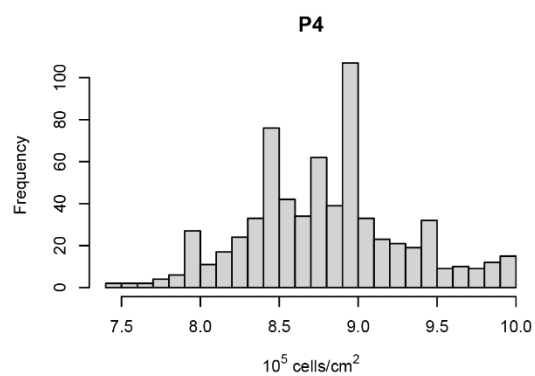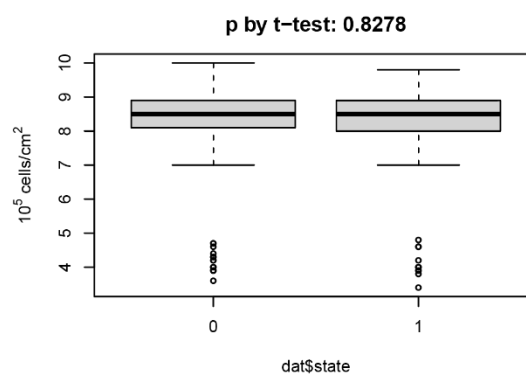

**Supplementary Figure S4 .** MSC signatures abstracted with the PCA method.

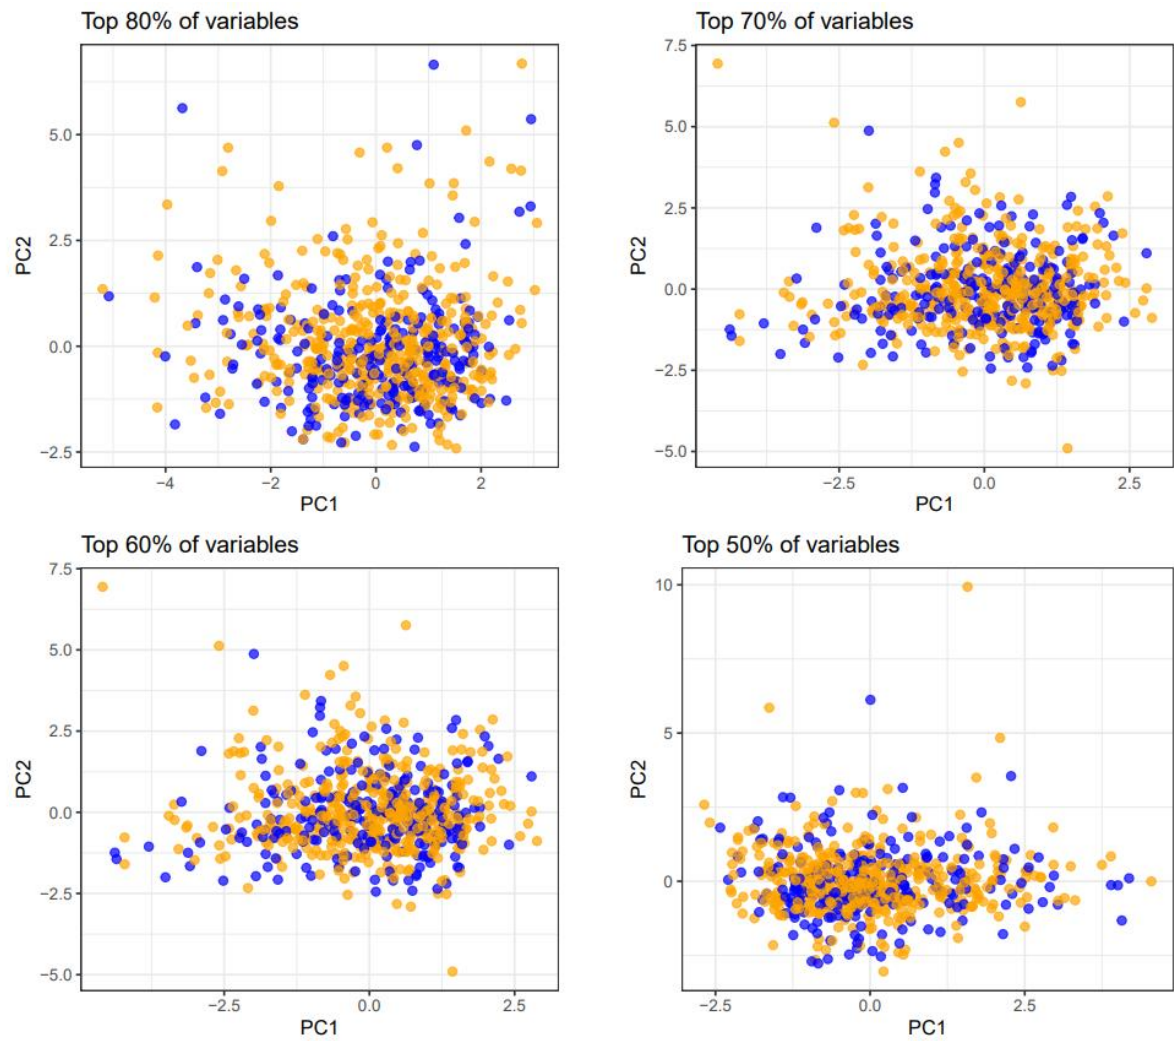

**Supplementary Table S1.** General characteristics of BM-MSCs according to the method of preservation.

| Features                                         | Freshly preserved | Cryo-preserved | <i>p</i> -value |
|--------------------------------------------------|-------------------|----------------|-----------------|
| Number                                           | 426               | 245            |                 |
| Age, years                                       | 58.5 ± 0.78       | 55 ± 1.34      | 0.024           |
| Manufacturing duration, days                     | 28.3 ± 0.11       | 28.2 ± 0.12    | 0.726           |
| BM amount, mL                                    | 22.8 ± 0.43       | 16.1 ± 0.41    | <0.001          |
| MNC, 10 <sup>5</sup> cells/cm <sup>2</sup>       | 213.2 ± 1.82      | 211.9 ± 2.14   | 0.645           |
| MSC at P0, 10 <sup>5</sup> cells/cm <sup>2</sup> | 5.7 ± 0.11        | 5.4 ± 0.14     | 0.248           |
| MSC at P1, 10 <sup>5</sup> cells/cm <sup>2</sup> | 8.3 ± 0.05        | 8.2 ± 0.07     | 0.292           |
| MSC at P2, 10 <sup>5</sup> cells/cm <sup>2</sup> | 8.6 ± 0.02        | 8.5 ± 0.03     | 0.023           |
| MSC at P3, 10 <sup>5</sup> cells/cm <sup>2</sup> | 8.8 ± 0.02        | 8.7 ± 0.03     | 0.006           |
| MSC at P4, 10 <sup>5</sup> cells/cm <sup>2</sup> | 8.8 ± 0.02        | 8.8 ± 0.03     | 0.828           |

Continuous variables are expressed as mean ± standard deviation *p*-value was evaluated using Student's t-test.  
Abbreviations: BM, bone marrow; MNC, mononuclear cell; MSC, mesenchymal stem cell; P, passage in cell culture

**Supplementary Table S2 .** Summary statistics (interquartile ranges and median) for PDT.

|                         | <b>25 percentiles</b> | <b>Median</b> | <b>75 percentiles</b> |
|-------------------------|-----------------------|---------------|-----------------------|
| <b>P0_doubling time</b> | 50.26                 | 59.19         | 71.61                 |
| <b>P1_doubling time</b> | 49.72                 | 59.09         | 70.105                |
| <b>P2_doubling time</b> | 55.34                 | 64.13         | 74.055                |
| <b>P3_doubling time</b> | 54.87                 | 65.71         | 78.705                |
| <b>P4_doubling time</b> | 70.72                 | 84.58         | 106.98                |



**Supplementary Table S3 .** Summary statistics (interquartile ranges and median) for MSC viability.

|                     | <b>25 percentiles</b> | <b>Median</b> | <b>75 percentiles</b> |
|---------------------|-----------------------|---------------|-----------------------|
| <b>P0_viability</b> | 97.6                  | 98.5          | 99.2                  |
| <b>P1_viability</b> | 97.5                  | 98.6          | 99.3                  |
| <b>P2_viability</b> | 98                    | 98.7          | 99.3                  |
| <b>P3_viability</b> | 97.5                  | 98.6          | 99.2                  |
| <b>P4_viability</b> | 86.65                 | 90.7          | 96.2                  |

**Supplementary Table S4 .** Summary statistics (interquartile ranges and median) for CD markers.

|              | <b>25 percentiles</b> | <b>Median</b> | <b>75 percentiles</b> |
|--------------|-----------------------|---------------|-----------------------|
| <b>CD105</b> | 98.335                | 99.36         | 99.76                 |
| <b>CD73</b>  | 99.73                 | 99.91         | 99.97                 |
| <b>CD34</b>  | 0.63                  | 0.77          | 0.92                  |
| <b>CD45</b>  | 0.56                  | 0.73          | 0.88                  |
| <b>CD14</b>  | 0.81                  | 0.99          | 1.21                  |

**Supplementary Table S5 .** Summary statistics (interquartile ranges and median) for CD markers.

|              | <b>25 percentiles</b> | <b>Median</b> | <b>75 percentiles</b> |
|--------------|-----------------------|---------------|-----------------------|
| <b>VEGF</b>  | 1206.05               | 1537.8        | 2071.55               |
| <b>MCP.1</b> | 245.3                 | 394           | 587.4                 |
| <b>IL.6</b>  | 1090.7                | 1664.8        | 2442.2                |
